# Supplementary material for: Intestinal regulation of suppression of tumorigenicity 14 (ST14) and serine peptidase inhibitor, Kunitz type -1 (SPINT1) by transcription factor CDX2
Source: PubMed Central journal article supplement (PMC6081401; doi:10.1038/s41598-018-30216-z), 2018-08-07

Intestinal regulation of *suppression of tumorigenicity 14 (ST14)* and *serine peptidase inhibitor, Kunitz type -1 (SPINT1)* by transcription factor CDX2

E. Thomas Danielsen, Anders Krüger Olsen, Mehmet Coskun, Annika W. Nonboe, Sylvester Larsen, Katja Dahlgaard<sup>1</sup>, Eric Paul Bennett, Cathy Mitchelmore, Lotte Katrine Vogel and Jesper Thorvald Troelsen

## **Supporting Information**

| Name         | Sequence (5'-3')                                                |
|--------------|-----------------------------------------------------------------|
| st14 prom.   | F: AACAGTGGAAAATGGGCAAG<br>R: GGTCTCACAGGCGTCGTC                |
| st14 enh.    | F: GGATCCTCCTTTGGCCAGGATCTAAC<br>R: GGATCCAGCGAGGCTGTCAGCAGT    |
| SPINT1 prom. | F: TGGAGGATGTTGCAGTTCAG<br>R: CTTCTCCCCCTGGTTTCTG               |
| SPINT1 enh.  | F: GTCGACGCACTGAGAGCTTCCAAACC<br>R: GTCGACTCCCTCCTTGCATTTTGTAGA |

**Table S1: Primers targeting genomic DNA amplification used for cloning and construction of luciferase reporter plasmids.**

| Name                  | Sequence (5'-3')                                                                                    |
|-----------------------|-----------------------------------------------------------------------------------------------------|
| ST14 enh_wtCDX2-A     | F: GATCCTATCTGTGTTTATGGTAAGCAGACG<br>R: TCGACGTCTGCTTACCATAAACACAGATAG                              |
| ST14 enh_mutCDX2-A    | F: GATCCTATCTGTG <u>CATAT</u> GGTAAGCAGACG<br>R: TCGACGTCTGCTTACC <u>CATAT</u> GCACAGATAG           |
| ST14 enh_wtCDX2-B     | F: GATCCATAGCACCGTTTTATGTGTGCACCG<br>R: TCGACGGTGCACACATAAAACGGTGCTATG                              |
| ST14 enh_mutCDX2-B    | F: GATCCATAGCACCG <u>CATAT</u> GGTGTGCACCG<br>R: TCGACGGTGCACACC <u>CATAT</u> GCGGTGCTATG           |
| ST14 enh_wtCDX2-C     | F: GATCCTTCACTGACTTTATTAACTTTGTGG<br>R: TCGACCACAAAGTTAATAAAGTCAGTGAAG                              |
| ST14 enh_mutCDX2-C_#1 | F: GATCCTTCACTGACTT <u>CATAT</u> GCTTTGTGG<br>R: TCGACCACAAAG <u>CATAT</u> GAAGTCAGTGAAG            |
| ST14 enh_mutCDX2-C_#2 | F: GATCCTTCACTGACTT <u>CATAT</u> GCT <u>T</u> GTGG<br>R: TCGACCACAGAG <u>CATAT</u> GAAGTCAGTGAAG    |
| ST14 enh_wtCDX2-D     | F: GATCCTGTTCTTATCAATAAAACGATGGGG<br>R: TCGACCCCATCGTTTTATTGATAAGAACAG                              |
| ST14 enh_mutCDX2-D    | F: GATCCTGTTCTT <u>CATAT</u> GAAAACGATGGGG<br>R: TCGACCCCATCGTTTT <u>CATAT</u> GAAGAACACCTAG        |
| ST14 enh_wtCDX2-E     | F: GATCCAAGAGCTAAGGTTATAAAAGGAAGG<br>R: TCGACCTTCCTTTTATAACCTTAGCTCTTG                              |
| ST14 enh_mutCDX2-E    | F: GATCCAAGAGCTAAGGTT <u>CATAT</u> GGAAGG<br>R: TCGACCTTCC <u>CATAT</u> GAACCTTAGCTCTTG             |
| SPINT-1 enh_wtCDX2    | F: GCTGGTTTTATTGCCACTCTAGCC<br>R: GGGCTAGAGTGGCAATAAAACCAG                                          |
| SPINT-1 enh_mutCDX2   | F: TGGGGGAGGGGCTGG <u>CATAT</u> GTGCCACTCTAGCCCT<br>R: GGGCTAGAGTGGC <u>CATAT</u> GCCAGCCCCTCCCCCAG |
| *Unspecific           | F: AACGTAGCTGATCGAATCGGTTAC<br>R: AGTAACCGATTTCGATCAGCTACGT                                         |

**Table S2: Oligonucleotides used for EMSA, gel shift assay. Mutations introduced in CDX2 predicted binding sites are underlined. \*The sequences for the Unspecific oligonucleotides has previously been demonstrated not to bind CDX2<sup>1</sup>.**

| Name               | Sequence (5'-3')                                    | Amplicon (bp) |
|--------------------|-----------------------------------------------------|---------------|
| <i>ST14</i> enh.   | F: CCCACCCAGGAGTTAAAAG<br>R: AAAGAGAGGGAGTGGCCTGT   | 82            |
| <i>SPINT1</i> enh. | F:GTCCTATGAAGGAGTGGCTTAGG<br>R: CCCCTCCCCAGTTAGTTAC | 80            |
| <i>HEPH</i> prom.  | F: AGCAGAGGCCTTATCCCTTC<br>R: GCTGAGATCCAAGTCCAAGC  | 65            |

**Table S3: Primers used for ChIP-qPCR analysis.**

| Name           | Sequence (5'-3')                                                                                 | Amplicon (bp) |
|----------------|--------------------------------------------------------------------------------------------------|---------------|
| <i>ST14</i>    | F: GCGCTCCCTGAAGTCCTTT<br>R: GTCCTGGGTCCTCTGTACTGTTTT<br>Probe: FAM-TCACCTCAGTGGTGGCTTTCCCCA-BHQ | 56            |
| <i>SPINT1</i>  | F: CGCGGCATCTCCAAGAAG<br>R: GAACACTGCGACAGCCATCTC<br>Probe:FAM-AAATCCCCATTCCCAGCACAGGCTC-BHQ.    | 90            |
| <i>β-Actin</i> | Pre-developed and commercially available probe/primers, part. no.4310881E, Applied Biosystems    |               |

**Table S4: Primers and probes used for RT-qPCR analysis.**

## Figure legends

**Figure S1.** Previous published ChIP-seq tracks<sup>2</sup> reveal that the *ST14* enhancer (marked with red box) is enriched in both CDX2 and HNF4A binding in open chromatin region covered by H3K4me2 in Caco-2 cells. Image obtained from UCSC Genome Browser<sup>3</sup>.

**Figure S2.** Additional ChIP-seq tracks from Caco-2 cells<sup>2</sup> shows that the investigated *SPINT1* enhancer (marked with red box) has binding peaks of H3K4me, CDX2 and HNF4A. Image is extracted from the UCSC Genome Browser<sup>3</sup>.

**Figure S3.** *In silico* analysis of the *ST14* promoter. Clustal W alignment of the human *ST14* promoter sequence (position -947 to +173 (1120 bp) relative to the transcriptional start site) with the mouse sequence. Conserved positions are marked with red. Putative binding sites (obtained from Transfac software) are marked with arrows: CDX2 (white), Sp1 (purple) and GATA4 (green). The graphical view was created with the software, CLC Main Workbench version 6.

**Figure S4.** *In silico* analysis of the *SPINT1* promoter. Clustal W alignment of the human *SPINT1* promoter sequence (-1030 to +27 (1057 bp) relative to the transcriptional start site (TSS)) with the mouse sequence. Putative binding sites are marked with arrows: CDX2 (white), Sp1 (purple) and GATA4 (green)

## List of references

- 1 Jorgensen, S., Coskun, M., Homburg, K. M., Pedersen, O. B. & Troelsen, J. T. HOXB4 Gene Expression Is Regulated by CDX2 in Intestinal Epithelial Cells. *PloS one* **11**, e0164555, doi:10.1371/journal.pone.0164555 (2016).
- 2 Verzi, M. P. *et al.* Differentiation-specific histone modifications reveal dynamic chromatin interactions and partners for the intestinal transcription factor CDX2. *Developmental cell* **19**, 713-726, doi:10.1016/j.devcel.2010.10.006 (2010).
- 3 Tyner, C. *et al.* The UCSC Genome Browser database: 2017 update. *Nucleic acids research* **45**, D626-D634, doi:10.1093/nar/gkw1134 (2017).

Figure S1

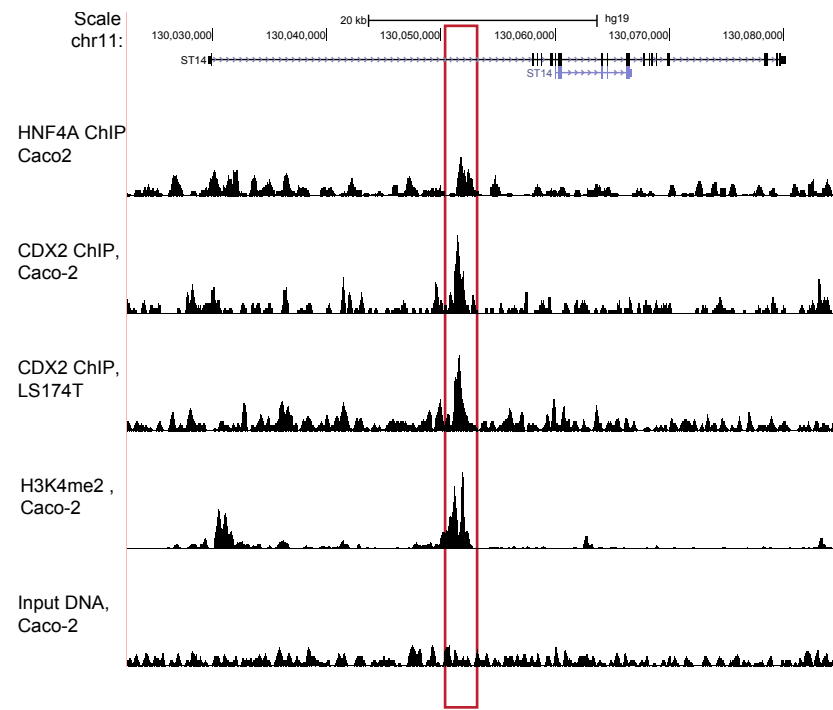

Figure S2

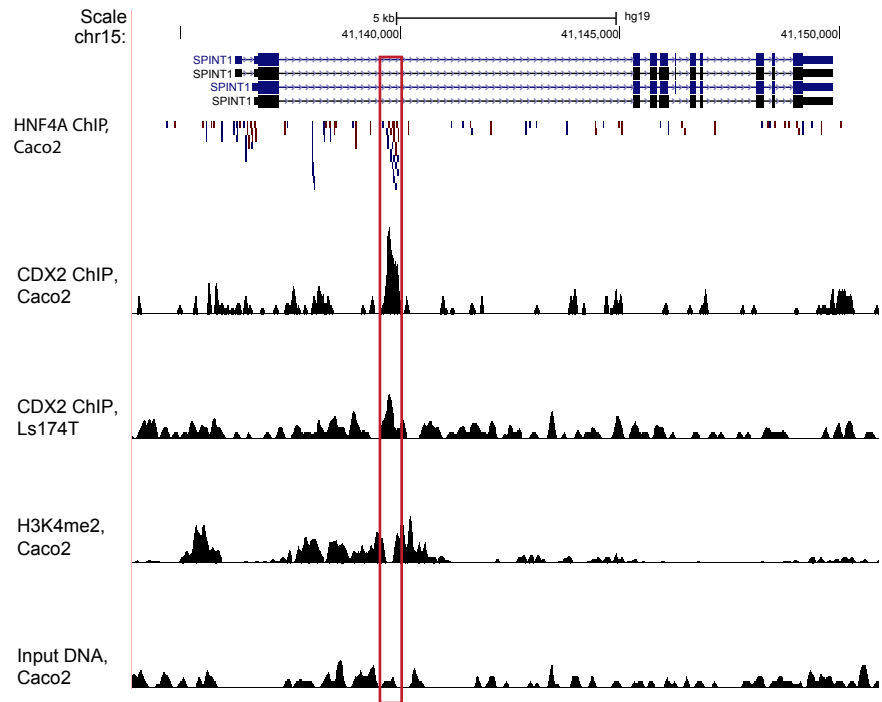



# Figure S4

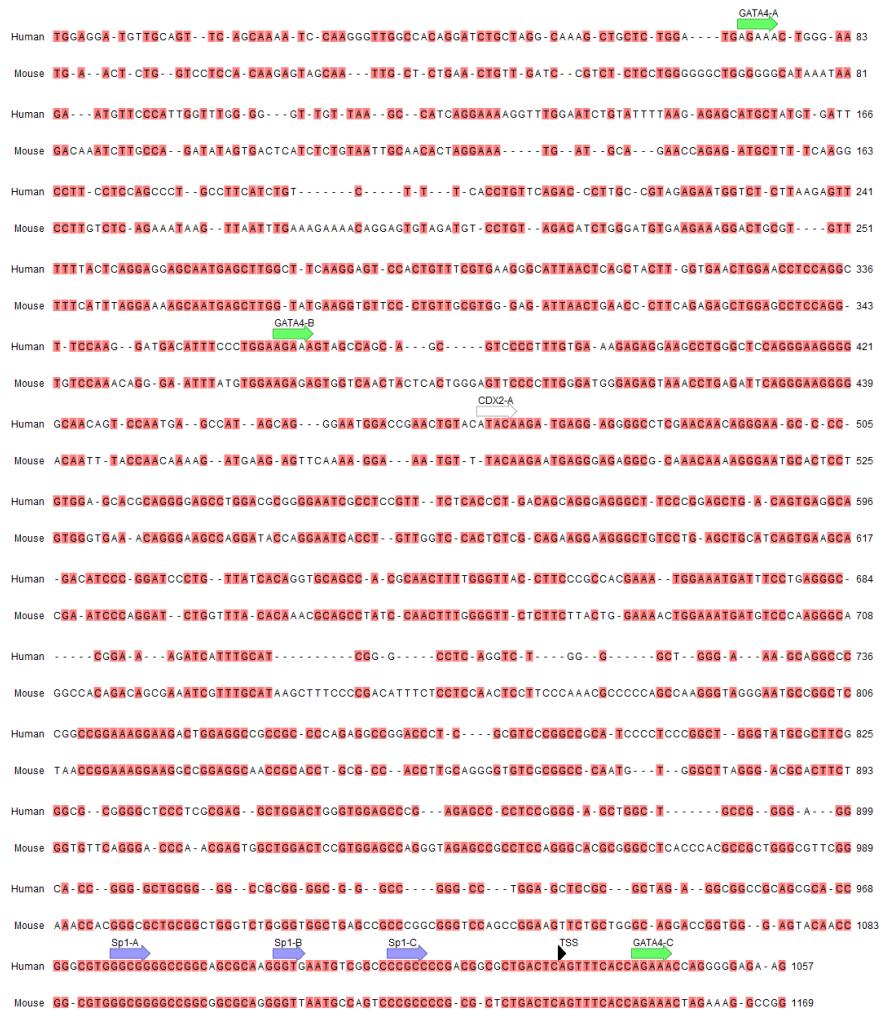

Supplement: 41598_2018_30216_MOESM1_ESM.pdf [file 41598_2018_30216_MOESM1_ESM.pdf]
